# Supplementary material for: Impact of FAK Expression on the Cytotoxic Effects of CIK Therapy in Triple-Negative Breast Cancer
Source: PubMed Central journal article supplement (PMC7017032; doi:10.3390/cancers12010094), 2019-12-30

Article

# Impact of FAK Expression on the Cytotoxic Effects of CIK Therapy in Triple-Negative Breast Cancer

Mei-Ren Pan <sup>1,2,†</sup>, Cheng-Che Wu <sup>3,4,†</sup>, Jung-Yu Kan <sup>3,4</sup>, Qiao-Lin Li <sup>1</sup>, Shu-Jyuan Chang <sup>5</sup>, Chun-Chieh Wu <sup>2,6</sup>, Chung-Liang Li <sup>3,4</sup>, Fu Ou-Yang <sup>2,3,4</sup>, Ming-Feng Hou <sup>1-5</sup>, Hon-Kan Yip <sup>7,8</sup> and Chi-Wen Luo <sup>2,3,4,\*</sup>

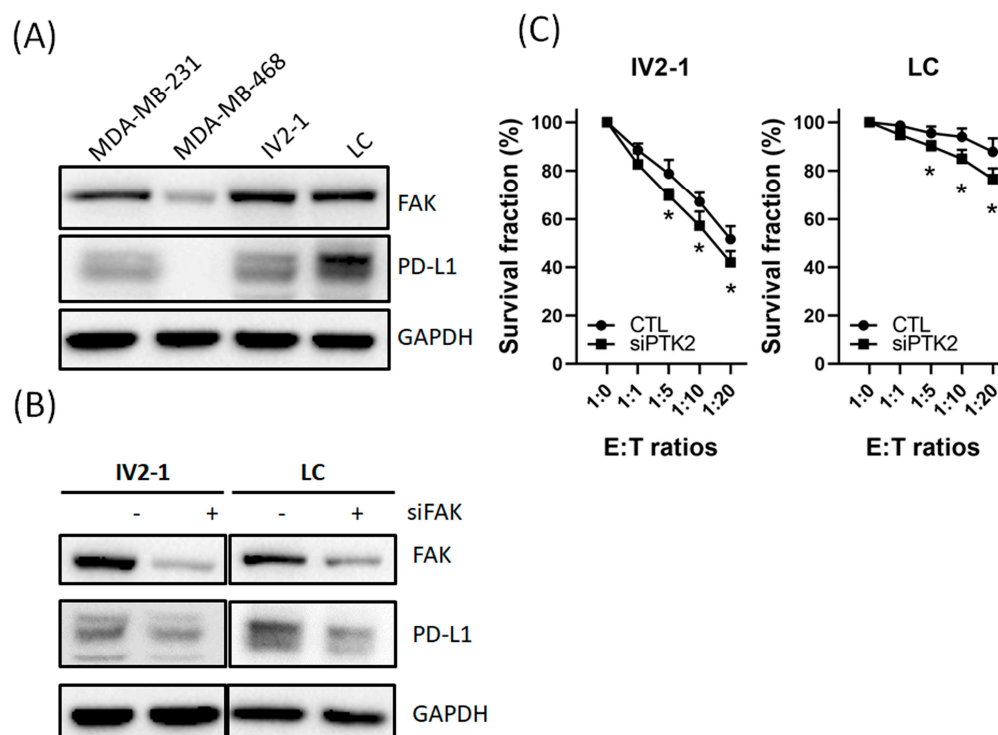

**Supplementary Figure S1.** The role of FAK in regulating TNBC cells to CIK cell. **(A)** Basal FAK and PD-L1 expressions in MDA-MB-231, MDA-MB-468, IV2-1 and LC-1 cells. **(B)** PD-L1 expression decreased after siRNA-mediated knockdown of FAK expression in IV2-1 and LC-1 cells. **(C)** Knockdown of FAK in IV2-1 and LC-1 cells, followed by coculture with CIK cells increased the death of both cells. Data from three independent experiments were used for statistical analysis and  $* p < 0.05$ .

Original Western Blot Figures

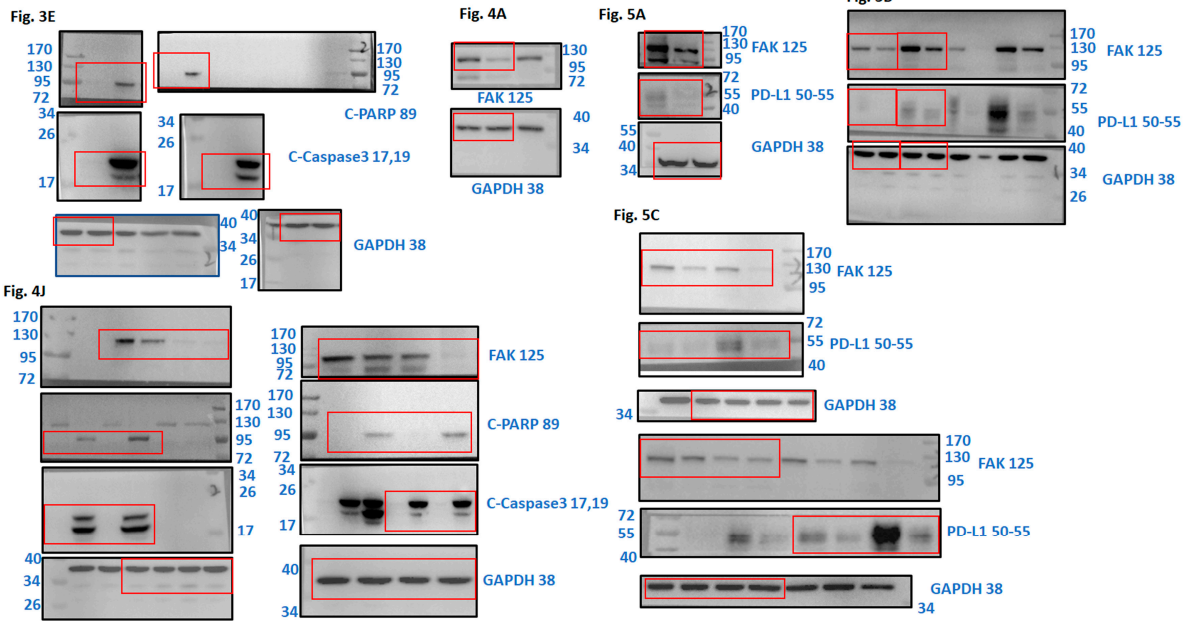

Supplement: cancers-12-00094-s001.pdf [file cancers-12-00094-s001.pdf]
